# Supplementary material for: Dynamic Changes in Hepatitis A Immunity in Regions with Different Vaccination Strategies and Different Vaccination Coverage
Source: MDPI journal article supplement (doi:10.3390/vaccines10091423), 2022-08-29
Supplement: s1 [file s1]

**Supplementary Table S6.** Hepatitis A vaccination coverage in 2014-2021 in studied regions compared to the average in Russia

| Region            | Year | HAV vaccination coverage   |                                   |                                                       |                                                    |                                   |                                               |
|-------------------|------|----------------------------|-----------------------------------|-------------------------------------------------------|----------------------------------------------------|-----------------------------------|-----------------------------------------------|
|                   |      | Total number of vaccinated | Total population, thousand people | Vaccination coverage in total population, per 100,000 | Total number of vaccinated children under 18 years | Child population, thousand people | Vaccination coverage in children, per 100,000 |
| Moscow region     | 2014 | 63,926                     | 18,920.5                          | 337.9                                                 | 23,843                                             | 2,927.5                           | 814.3                                         |
|                   | 2015 | 67,833                     | 19,134.9                          | 354.5                                                 | 23,262                                             | 3,013.4                           | 771.9                                         |
|                   | 2016 | 61,436                     | 19,332.8                          | 317.8                                                 | 18,744                                             | 3,111.0                           | 602.5                                         |
|                   | 2017 | 82,904                     | 19,263.8                          | 430.4                                                 | 16,514                                             | 3,229.2                           | 511.4                                         |
|                   | 2018 | 112,226                    | 19,726.9                          | 568.9                                                 | 22,772                                             | 3,353.4                           | 679.1                                         |
|                   | 2019 | 109,123                    | 20,119.4                          | 542.4                                                 | 25,892                                             | 3,566.4                           | 726.0                                         |
|                   | 2020 | 110,520                    | 20,293.0                          | 544.6                                                 | 37,955                                             | 3,651.6                           | 1,039.4                                       |
|                   | 2021 | 141,862                    | 20,293.6                          | 699.0                                                 | 50,730                                             | 3,651.6                           | 1,389.3                                       |
| Sverdlovsk region | 2014 | 117,680                    | 4,311.9                           | 2,792.1                                               | 92,344                                             | 801.7                             | 11,518.7                                      |
|                   | 2015 | 107,876                    | 4,316.8                           | 2,499.0                                               | 80,624                                             | 816.3                             | 9,876.4                                       |
|                   | 2016 | 71,744                     | 4,322.8                           | 1,659.7                                               | 49,017                                             | 833.3                             | 5,882.0                                       |
|                   | 2017 | 55,847                     | 4,328.7                           | 1,290.2                                               | 37,608                                             | 868.9                             | 4,328.5                                       |
|                   | 2018 | 44,914                     | 4,329.6                           | 1,037.4                                               | 24,848                                             | 891.9                             | 2,786.0                                       |
|                   | 2019 | 42,049                     | 4,320.6                           | 973.2                                                 | 24,482                                             | 952.2                             | 2,570.1                                       |
|                   | 2020 | 34,545                     | 4,314.0                           | 800.8                                                 | 19,042                                             | 934.1                             | 2,038.5                                       |
|                   | 2021 | 35,715                     | 4,314.0                           | 827.9                                                 | 22,648                                             | 934.2                             | 2,424.3                                       |
| Tuva Republic     | 2014 | 15,206                     | 309.9                             | 4,907.4                                               | 14,982                                             | 108.7                             | 13,783                                        |
|                   | 2015 | 8,433                      | 311.1                             | 2,710.6                                               | 8,433                                              | 110.8                             | 7,613.8                                       |
|                   | 2016 | 6,016                      | 312.5                             | 1,925.1                                               | 6,016                                              | 112.8                             | 5,334.0                                       |
|                   | 2017 | 10,244                     | 314.7                             | 3,255.6                                               | 10,244                                             | 115.0                             | 8,909.6                                       |
|                   | 2018 | 8,586                      | 317.1                             | 2,707.7                                               | 8,586                                              | 117.0                             | 7,337.3                                       |
|                   | 2019 | 7,674                      | 321.2                             | 2,389.3                                               | 7,661                                              | 120.6                             | 6,352.6                                       |
|                   | 2020 | 6,932                      | 327.0                             | 2,120.0                                               | 6,932                                              | 122.0                             | 5,684.2                                       |
|                   | 2021 | 6,520                      | 326.1                             | 1,999.5                                               | 6,499                                              | 121.8                             | 5,336.4                                       |
|                   | 2014 | 32,035                     | 955.8                             | 3,351.7                                               | 21,521                                             | 254.2                             | 8,464.9                                       |

|                                   |      |         |           |         |         |          |         |
|-----------------------------------|------|---------|-----------|---------|---------|----------|---------|
| Sakha<br>Republic<br>(Yakutia)    | 2015 | 20,989  | 955.1     | 2,197.6 | 12,210  | 254.8    | 4,792.4 |
|                                   | 2016 | 22,950  | 955.8     | 2,401.1 | 13,235  | 256.4    | 5,161.7 |
|                                   | 2017 | 20,449  | 958.3     | 2,133.9 | 11,609  | 259.6    | 4,471.7 |
|                                   | 2018 | 18,365  | 961.2     | 1,910.5 | 10,331  | 262.0    | 3,943.0 |
|                                   | 2019 | 14,756  | 965.7     | 1,528.0 | 8,437   | 264.2    | 3,193.5 |
|                                   | 2020 | 13,030  | 969.5     | 1,344.0 | 8,418   | 267.8    | 3,143.5 |
|                                   | 2021 | 12,441  | 969.5     | 1,283.2 | 8,470   | 264.1    | 3,206.7 |
| Khabarovsk<br>region              | 2014 | 7,916   | 1,342.8   | 589.5   | 7,521   | 243.9    | 3,083.6 |
|                                   | 2015 | 1,530   | 1,341.5   | 114.1   | 1,291   | 246.9    | 522.8   |
|                                   | 2016 | 3,205   | 1,338.6   | 239.4   | 2,931   | 252.5    | 1,161.0 |
|                                   | 2017 | 3,476   | 1,336.5   | 260.1   | 2,973   | 259.1    | 1,147.6 |
|                                   | 2018 | 2,458   | 1,334.0   | 184.3   | 2,099   | 263.1    | 797.8   |
|                                   | 2019 | 2,460   | 1,324.9   | 185.7   | 1,390   | 274.6    | 506.2   |
|                                   | 2020 | 14,490  | 1,318.3   | 1,099.1 | 3,624   | 277.2    | 1,307.2 |
|                                   | 2021 | 1,687   | 1,319.7   | 127.8   | 1,024   | 277.2    | 369.4   |
| Russian<br>Federation,<br>average | 2014 | 519,857 | 143,207.3 | 363.0   | 321,459 | 26,722.0 | 1,203.1 |
|                                   | 2015 | 475,390 | 145,886.2 | 325.7   | 298,003 | 27,411.8 | 1,087.1 |
|                                   | 2016 | 427,201 | 146,063.2 | 292.5   | 255,710 | 27,826.1 | 919.0   |
|                                   | 2017 | 502,575 | 146,415.8 | 343.3   | 260,222 | 28,647.1 | 908.4   |
|                                   | 2018 | 469,605 | 146,671.5 | 320.2   | 162,209 | 29,294.1 | 553.7   |
|                                   | 2019 | 504,116 | 146,793.3 | 343.4   | 178,081 | 30,099.0 | 591.6   |
|                                   | 2020 | 349,695 | 146,764.1 | 238.3   | 129,435 | 30,291.7 | 427.3   |
|                                   | 2021 | 436,993 | 146,815.7 | 297.6   | 181,016 | 30,295.7 | 597.5   |
