# Supplementary material for: Dynamic Changes in Hepatitis A Immunity in Regions with Different Vaccination Strategies and Different Vaccination Coverage
Source: MDPI journal article supplement (doi:10.3390/vaccines10091423), 2022-08-29
Supplement: s1 [file s1]

**Table S1.** Age-specific anti-HAV prevalence, Moscow Region

| Age group, years | Year | N    | N pos (>20 IU/l) | %    | 95% CI      | P value* |
|------------------|------|------|------------------|------|-------------|----------|
| <1               | 2008 | 97   | 24               | 24.7 | 17.2 – 34.2 | 1        |
|                  | 2020 | 0    | -                | -    | -           |          |
| 1-9              | 2008 | 237  | 31               | 13.1 | 9.3 – 18.0  | 0.7224   |
|                  | 2020 | 530  | 64               | 12.1 | 9.6 – 15.1  |          |
| 10-14            | 2008 | 121  | 21               | 17.4 | 11.6 – 25.2 | 0.0042   |
|                  | 2020 | 184  | 12               | 6.5  | 3.8 – 11.0  |          |
| 15-19            | 2008 | 152  | 29               | 19.1 | 13.6 – 26.1 | 0.0009   |
|                  | 2020 | 212  | 15               | 7.1  | 4.3 – 11.3  |          |
| 20-29            | 2008 | 104  | 38               | 36.5 | 27.9 – 46.1 | >0.0001  |
|                  | 2020 | 2012 | 240              | 11.9 | 10.6 – 13.4 |          |
| 30-39            | 2008 | 100  | 41               | 41.0 | 31.9 – 50.1 | >0.0001  |
|                  | 2020 | 2751 | 578              | 21.0 | 19.5 – 22.6 |          |
| 40-49            | 2008 | 105  | 59               | 56.2 | 46.7 – 65.3 | >0.0001  |
|                  | 2020 | 1044 | 379              | 36.3 | 33.4 – 39.3 |          |
| 50-59            | 2008 | 114  | 86               | 75.4 | 66.8 – 82.5 | >0.0001  |
|                  | 2020 | 490  | 239              | 48.8 | 44.4 – 53.2 |          |
| ≥60              | 2008 | 149  | 144              | 96.6 | 92.2 – 98.8 | >0.0001  |
|                  | 2020 | 269  | 195              | 72.5 | 66.9 – 77.5 |          |

\* Fisher's exact test

**Table S2.** Age-specific anti-HAV prevalence, Sverdlovsk Region

| Age group, years | Year | N   | N pos (>20 IU/l) | %    | 95% CI      | P value* |
|------------------|------|-----|------------------|------|-------------|----------|
| <1               | 2008 | 101 | 37               | 36.6 | 27.9 – 46.4 | 0.4180   |
|                  | 2020 | 35  | 10               | 28.6 | 16.2 – 45.2 |          |
| 1-9              | 2008 | 200 | 138              | 69.0 | 62.3 – 75.0 | >0.0001  |
|                  | 2020 | 137 | 29               | 21.2 | 15.1 – 28.8 |          |
| 10-14            | 2008 | 120 | 15               | 12.5 | 7.6 – 19.7  | >0.0001  |
|                  | 2020 | 61  | 41               | 67.2 | 54.7 – 77.7 |          |
| 15-19            | 2008 | 100 | 23               | 23.0 | 15.8 – 32.2 | >0.0001  |
|                  | 2020 | 204 | 162              | 79.4 | 73.3 – 84.4 |          |
| 20-29            | 2008 | 81  | 32               | 39.5 | 29.6 – 50.4 | 0.1523   |
|                  | 2020 | 51  | 27               | 65.4 | 54.3 – 75.0 |          |
| 30-39            | 2008 | 106 | 53               | 50.0 | 40.7 – 59.4 | 0.1232   |
|                  | 2020 | 147 | 58               | 39.5 | 31.9 – 47.5 |          |
| 40-49            | 2008 | 104 | 66               | 63.5 | 53.9 – 72.1 | 0.0247   |
|                  | 2020 | 102 | 48               | 47.1 | 37.7 – 56.7 |          |
| 50-59            | 2008 | 107 | 87               | 81.3 | 72.8 – 87.6 | >0.0001  |
|                  | 2020 | 99  | 54               | 54.6 | 44.8 – 64.0 |          |
| ≥60              | 2008 | 108 | 104              | 96.3 | 90.6 – 98.9 | 0.0011   |
|                  | 2020 | 99  | 81               | 81.8 | 73.0 – 88.3 |          |

\* Fisher's exact test

**Table S3.** Age-specific anti-HAV prevalence, Tuva Republic

| Age group, years | Year | N   | N pos (>20 IU/l) | %    | 95% CI      | P value*          |
|------------------|------|-----|------------------|------|-------------|-------------------|
| <1               | 2008 | 88  | 49               | 55.7 | 45.3 - 65.6 | <b>0.0041</b>     |
|                  | 2020 | 68  | 53               | 77.9 | 66.6 - 86.3 |                   |
| 1-9              | 2008 | 200 | 70               | 35.0 | 28.7 - 41.8 | <b>0.0016</b>     |
|                  | 2020 | 169 | 87               | 51.5 | 44.0 - 58.9 |                   |
| 10-14            | 2008 | 100 | 66               | 66.0 | 56.3 - 74.6 | 0.6399            |
|                  | 2020 | 85  | 59               | 69.4 | 58.9 - 78.2 |                   |
| 15-19            | 2008 | 100 | 86               | 86.0 | 77.7 - 91.6 | <b>&gt;0.0001</b> |
|                  | 2020 | 115 | 71               | 61.7 | 52.6 - 70.1 |                   |
| 20-29            | 2008 | 100 | 98               | 98.0 | 92.6 - 99.9 | <b>&gt;0.0001</b> |
|                  | 2020 | 70  | 42               | 60.0 | 48.3 - 70.7 |                   |
| 30-39            | 2008 | 100 | 96               | 96.0 | 89.8 - 98.8 | <b>0.0355</b>     |
|                  | 2020 | 139 | 122              | 80.1 | 73.2 - 86.3 |                   |
| 40-49            | 2008 | 100 | 98               | 98.0 | 92.6 - 99.9 | 0.6749            |
|                  | 2020 | 94  | 91               | 96.8 | 90.6 - 99.3 |                   |
| 50-59            | 2008 | 100 | 97               | 97.0 | 91.2 - 99.4 | 1                 |
|                  | 2020 | 89  | 87               | 97.8 | 91.7 - 99.9 |                   |
| ≥60              | 2008 | 123 | 122              | 99.2 | 95.1 - 100  | 1                 |
|                  | 2020 | 64  | 64               | 100  | 93.2 - 100  |                   |

\* Fisher's exact test

**Table S4.** Age-specific anti-HAV prevalence, Sakha Republic (Yakutia)

| Age group, years | Year | N   | N pos (>20 IU/l) | %    | 95% CI      | P value*          |
|------------------|------|-----|------------------|------|-------------|-------------------|
| <1               | 2008 | 103 | 23               | 22.3 | 15.3 - 31.3 | <b>0.0004</b>     |
|                  | 2020 | 58  | 29               | 50.0 | 37.5 - 62.5 |                   |
| 1-9              | 2008 | 203 | 46               | 22.7 | 17.4 - 28.9 | <b>&gt;0.0001</b> |
|                  | 2020 | 185 | 100              | 54.1 | 46.7 - 61.1 |                   |
| 10-14            | 2008 | 100 | 30               | 30.0 | 21.9 - 39.6 | <b>0.0157</b>     |
|                  | 2020 | 109 | 51               | 46.8 | 37.7 - 56.1 |                   |
| 15-19            | 2008 | 100 | 22               | 22.0 | 14.9 - 31.1 | <b>&gt;0.0001</b> |
|                  | 2020 | 90  | 61               | 67.8 | 57.5 - 76.6 |                   |
| 20-29            | 2008 | 123 | 61               | 49.6 | 40.9 - 58.3 | <b>0.0433</b>     |
|                  | 2020 | 101 | 64               | 63.4 | 53.6 - 72.1 |                   |
| 30-39            | 2008 | 100 | 66               | 66.0 | 56.3 - 74.6 | 0.8817            |
|                  | 2020 | 101 | 68               | 67.3 | 57.7 - 75.7 |                   |
| 40-49            | 2008 | 100 | 79               | 79.0 | 70.0 - 85.9 | 1                 |
|                  | 2020 | 85  | 68               | 80.0 | 70.2 - 87.2 |                   |
| 50-59            | 2008 | 99  | 88               | 88.9 | 81.0 - 93.8 | 0.3328            |
|                  | 2020 | 101 | 94               | 93.1 | 86.2 - 96.8 |                   |
| ≥60              | 2008 | 97  | 94               | 96.9 | 90.9 - 99.3 | 0.4714            |
|                  | 2020 | 81  | 76               | 93.8 | 86.0 - 97.7 |                   |

\* Fisher's exact test

**Table S5.** Age-specific anti-HAV prevalence, Khabarovsk Region

| Age group,<br>years | Year | N    | N pos (>20 IU/l) | %    | 95% CI      | P value* |
|---------------------|------|------|------------------|------|-------------|----------|
| <1                  | 2008 | 100  | 33               | 33.0 | 24.5 – 42.7 | 1        |
|                     | 2020 | 0    | -                | -    | -           |          |
| 1-9                 | 2008 | 197  | 25               | 12.7 | 8.7 – 18.1  | 0.3902   |
|                     | 2020 | 1255 | 191              | 15.2 | 13.3 – 17.3 |          |
| 10-14               | 2008 | 100  | 28               | 28.0 | 20.1 – 37.5 | 0.9042   |
|                     | 2020 | 515  | 150              | 29.1 | 25.4 – 33.2 |          |
| 15-19               | 2008 | 99   | 19               | 19.2 | 12.6 – 28.1 | 0.1319   |
|                     | 2020 | 527  | 141              | 26.8 | 23.2 – 30.7 |          |
| 20-29               | 2008 | 101  | 45               | 44.6 | 35.2 – 54.3 | >0.0001  |
|                     | 2020 | 713  | 141              | 19.8 | 17.0 – 22.9 |          |
| 30-39               | 2008 | 99   | 57               | 57.6 | 47.7 – 66.9 | >0.0001  |
|                     | 2020 | 624  | 201              | 32.2 | 28.7 – 36.0 |          |
| 40-49               | 2008 | 100  | 68               | 68.0 | 58.3 – 76.4 | 0.2808   |
|                     | 2020 | 294  | 181              | 61.6 | 55.9 – 66.9 |          |
| 50-59               | 2008 | 100  | 62               | 62.0 | 52.2 – 70.9 | 0.0627   |
|                     | 2020 | 333  | 240              | 72.1 | 67.0 – 76.6 |          |
| ≥60                 | 2008 | 99   | 79               | 79.8 | 70.8 – 86.6 | 0.0322   |
|                     | 2020 | 509  | 450              | 88.4 | 85.3 – 90.9 |          |

\* Fisher's exact test
